# Supplementary material
Source: PubMed Central journal article supplement (PMC3234864)
Supplement: supp_M111.289009_jbc.M111.289009-1.pdf [file supp_M111.289009_jbc.M111.289009-1.pdf]

GIP controls adipose insulin sensitivity via activation of CREB and p110 $\beta$  isoform of PI3 Kinase

**Sameer Mohammad<sup>1</sup>, Lavoisier S. Ramos<sup>2</sup>, Jochen Buck<sup>2</sup>, Lonny R. Levin<sup>2</sup>, Francesco Rubino<sup>3</sup>, and Timothy E. McGraw<sup>1#</sup>**

**Supplemental Figure legends.**

**Figure S1**

3T3-L1 adipocytes were serum starved for 2 h and incubated with indicated concentrations of GIP and isoproterenol in the presence of various concentrations of insulin for 30'. Cells were harvested in 1X sample buffer and loaded onto a 10% SDS gel. Blots were probed with anti-PKA-PAS and anti-perelipin antibodies.

**Figure S2**

3T3-L1 adipocytes were electroporated with HA-GLUT4-GFP alone or together with CREB constructs (WT, KCREB or CREB 133). Cells were fixed and stained with anti-CREB antibodies and imaged (A). Images were quantified to measure expression of CREB in cells positive for HA-GLUT4-GFP (B).

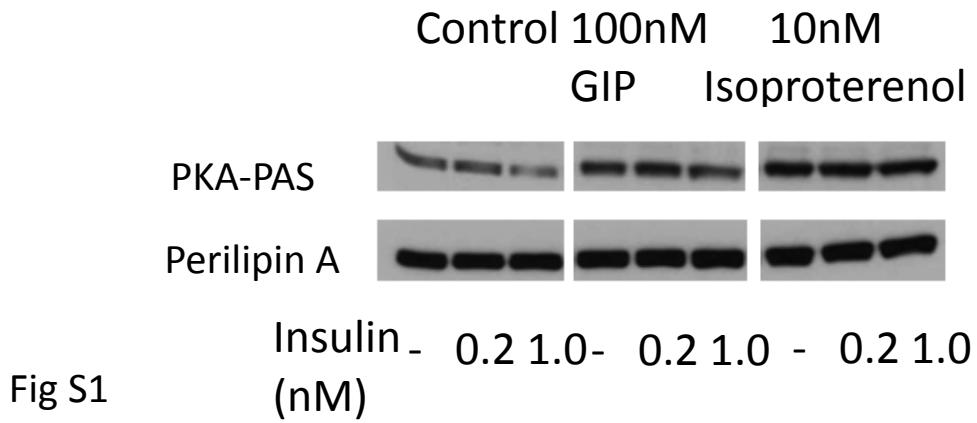

**A**

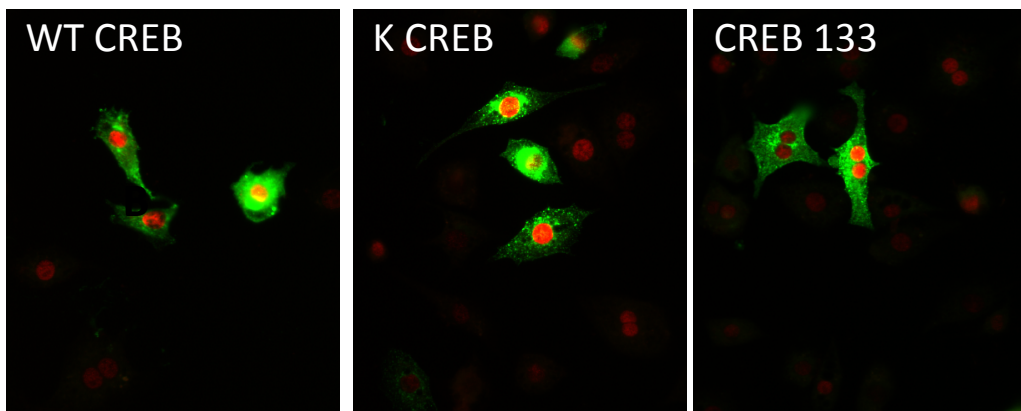

HA-GLUT4-GFP  
CREB

HA-GLUT4-GFP  
CREB

HA-GLUT4-GFP  
CREB

**B**

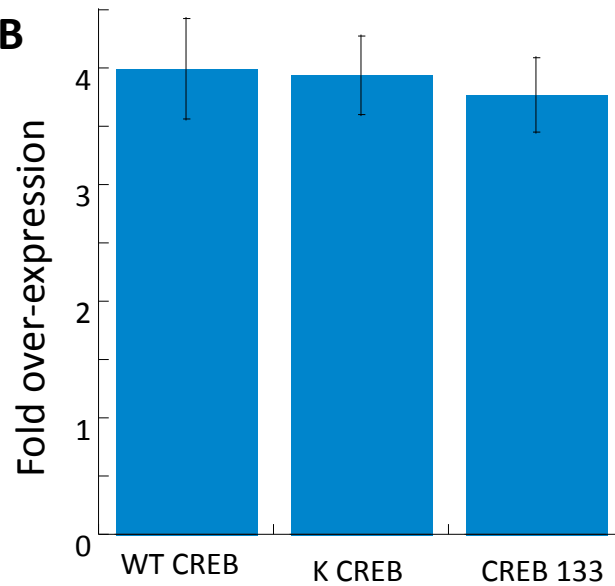

Fig S2
